# Supplementary material for: Nepenthesin Protease Activity Indicates Digestive Fluid Dynamics in Carnivorous Nepenthes Plants
Source: PubMed Central journal article supplement (PMC4353617; doi:10.1371/journal.pone.0118853), 2015-03-09
Supplement: pone.0118853.s001.pdf [file pone.0118853.s001.pdf]

## **Supporting Information**

### **Nepenthesin protease activity displays the digestive fluid dynamics in carnivorous *Nepenthes* plants**

Franziska Buch, Wendy E. Kaman, Floris J. Bikker, Ayufu Yilamujiang and Axel Mithöfer

**Figures A-D**

**Table A**

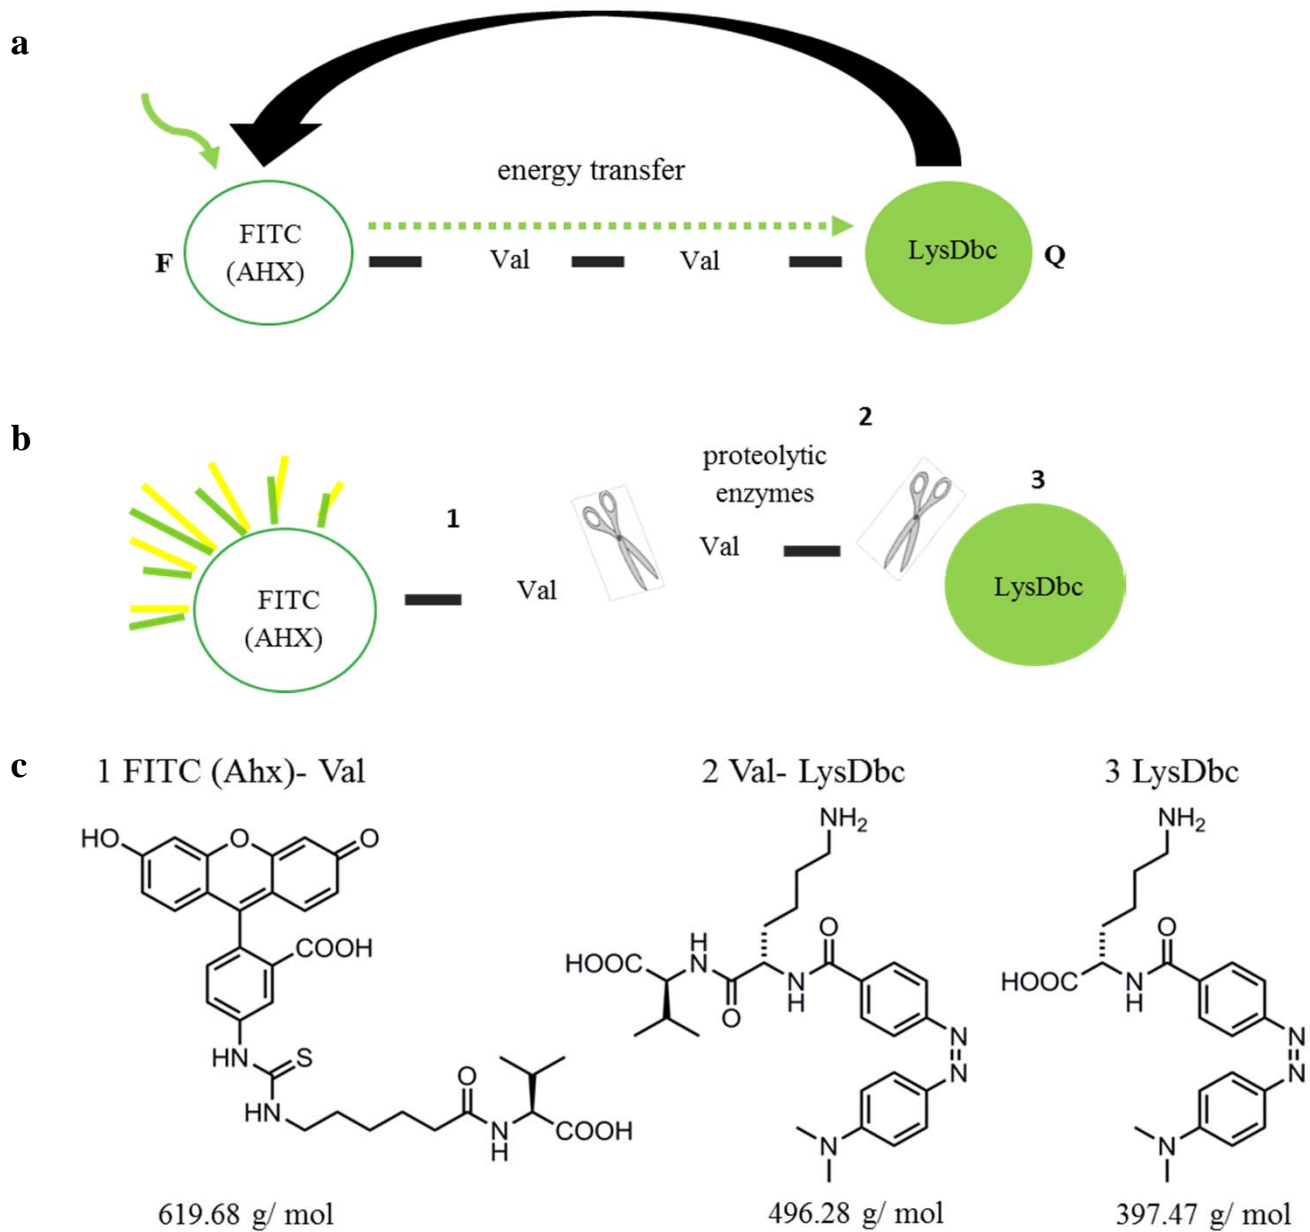

**Figure A. FRET-peptide, -method and putative cleavage sites.**

**a**

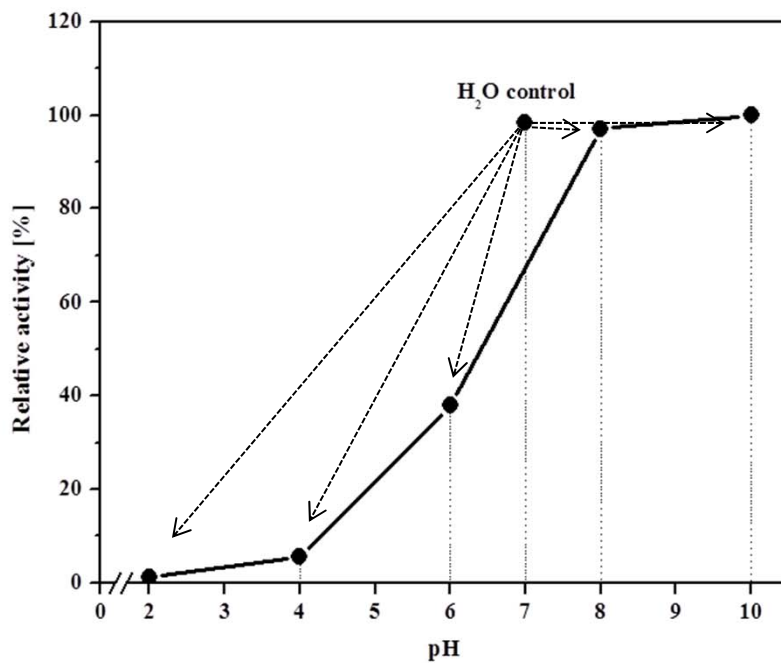

**b**

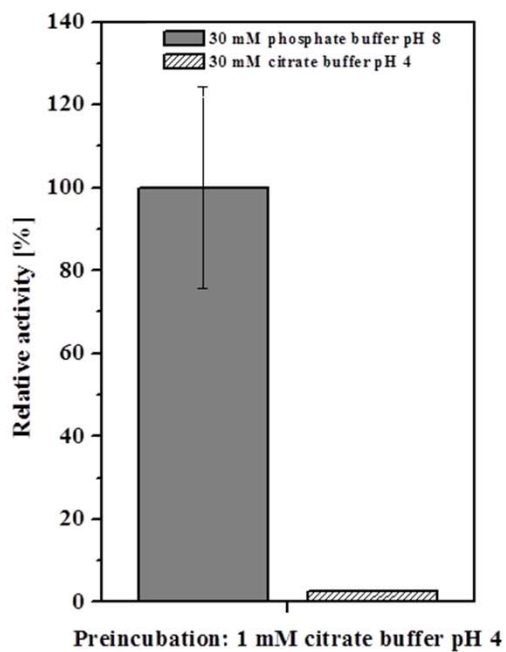

**Figure B. Substrate/ Product fluorescence dependence on different pH values.**

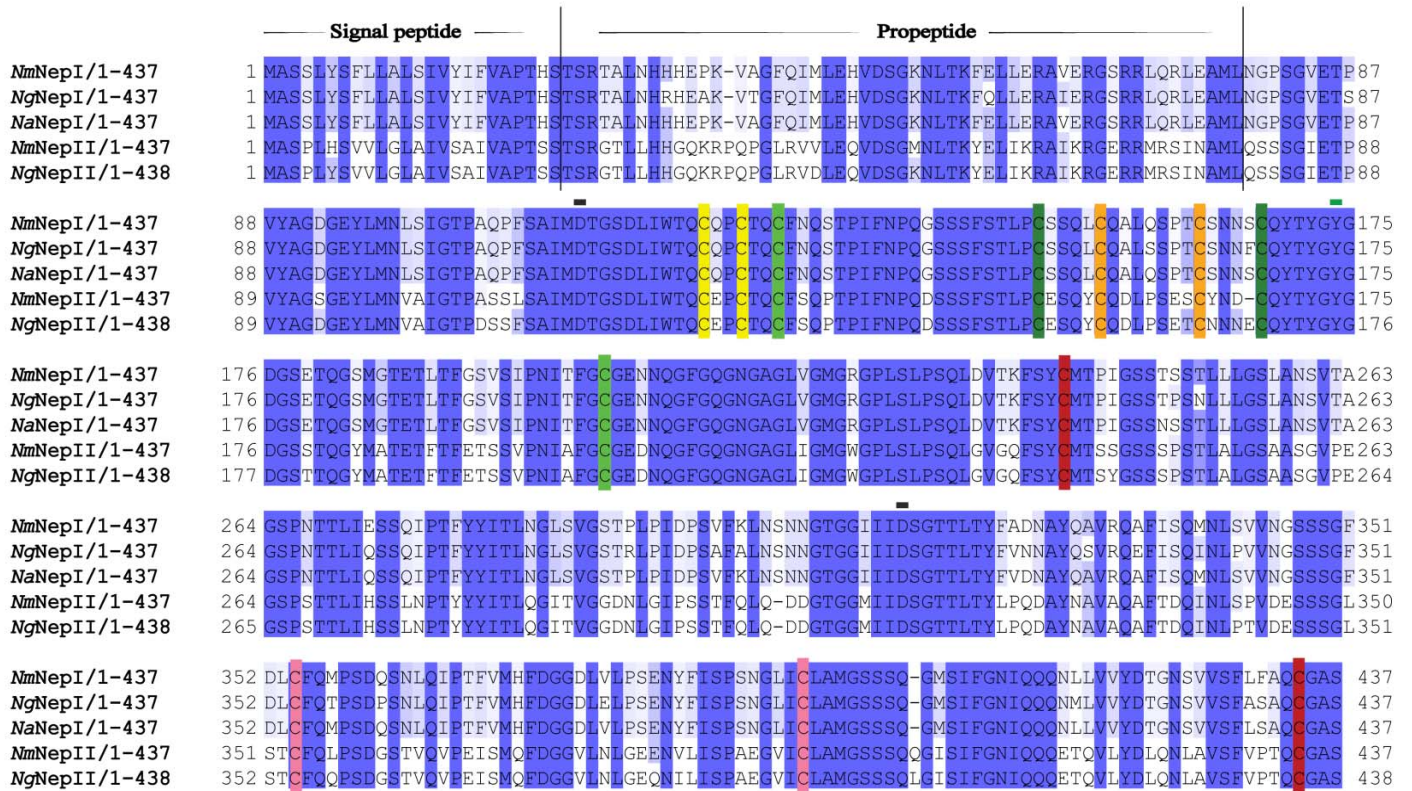

**Figure C. *N. mirabilis* nepenthesin I, II (*NmNepI/II*) protein alignment compared to *N. gracilis* (*Ng*) and *N. alata* (*Na*) nepenthesin amino acid sequences.**

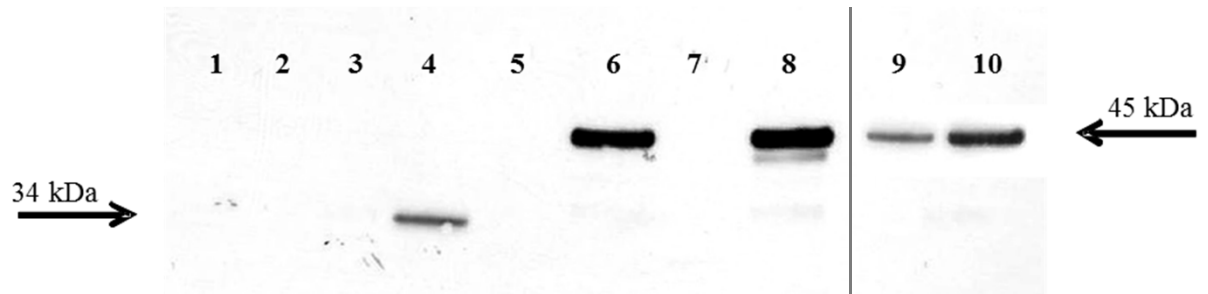

**Figure D. Western blot of recombinant *N. mirabilis* nepenthesin II.**

**Table A. List of primer sequences used in this study.**

|                                     |                                              |
|-------------------------------------|----------------------------------------------|
| 1_NepI_forward_partialSequence      | 5' CGGGCAAAAACCTTAACCAA 3'                   |
| 2_NepI_reverse_partialSequence      | 5' ACCGTCAAAATGCATCACAA 3'                   |
| 3_NepII_forward_partialSequence     | 5' TTCCTTGCGAGAGCCAGTAT 3'                   |
| 4_NepII_reverse_partialSequence     | 5' GCTGCTGGATATTCCCAAAA 3'                   |
| 5_NepI_3'-RACE                      | 5' GTGCTGTCGAAAGGGGGAGTCGTAG 3'              |
| 6_NepI_5'-RACE                      | 5' CGGAGAAAGGTTGTGCCGGAGTC 3'                |
| 7_NepII_3'-RACE                     | 5' CTCCTCACCCAGCACTCTCGCACTT 3'              |
| 8_NepII_5'-RACE                     | 5' ACCGCATTGTAAGCGTCTTGTGGAAG 3'             |
| 9_NepI_forward_pMIB/V5-HisAvector   | 5' TAATGCATGCTAACGTCAAGAACAGCTCTCAATC 3'     |
| 10_NepI_reverse_pMIB/V5-HisAvector  | 5' ATTATCTAGACGACGCACCACATTGAGCAC 3'         |
| 11_NepII_forward_pMIB/V5-HisAvector | 5' TAATGCATGCTAACCTCAAGAGGAACCCTTCTCATCAT 3' |
| 12_NepII_reverse_pMIB/V5-HisAvector | 5' ATTATCTAGACGACGCACCACACTGAGTAGGAACGAA 3'  |
